# Supplementary material
Source: MDPI journal article supplement (https://www.mdpi.com/1424-8247/15/11/1354)
Supplement: s1 [file s1]

## Supplementary materials

### Green biosynthesis of silver nanoparticles using *Annona glabra* and *Annona squamosa* extracts with antimicrobial, anticancer, apoptosis potentials, Assisted by *in Silico* Modeling, and Metabolic Profiling

Fatma A. Mokhtar<sup>1\*‡</sup>, Nabil M. Selim<sup>2\*‡</sup>, Seham S. Elhawary<sup>2</sup>, Soha R. Abd El Hadi<sup>3</sup>, Mona H. Hetta<sup>4</sup>, Marzough A albalawi<sup>5</sup>, Ali A. Shati<sup>6</sup>, Mohammad Y. Alfaifi<sup>6</sup>, Serag Eldin I. Elbehairi<sup>6,7</sup>, Lamia I. Fahmy<sup>8</sup>, Rana M. Ibrahim<sup>2</sup>

<sup>1</sup> Department of Pharmacognosy, Faculty of Pharmacy, Al Salam University, kafr al zayat, Al Gharbia, Egypt

<sup>2</sup> Pharmacognosy Department, Faculty of Pharmacy, Cairo University, Kasr-El-Ainy Street, 11562, Cairo, Egypt

<sup>3</sup> Department of Pharmaceutical Chemistry, Faculty of Pharmacy, Egyptian Russian University, Badr City, Cairo, Egypt

<sup>4</sup> Department of Pharmacognosy, Faculty of Pharmacy, Fayoum University, Fayoum, 63514, Egypt

<sup>5</sup> Department of Chemistry, Alwajh college, University of Tabuk, Saudi Arabia

<sup>6</sup> King Khalid University, Faculty of Science, Biology Department, Abha 9004, Saudi Arabia

<sup>7</sup> Cell Culture Lab, Egyptian Organization for Biological Products and Vaccines (VACSERA Holding Company), 51 Wezaret El-Zeraa St., Agouza, Giza, Egypt

<sup>8</sup> Department of microbiology and immunology, Faculty of Pharmacy, October University for Modern Sciences and Arts (MSA), Giza, Egypt

\*Corresponding authors;

Fatma A. Mokhtar: Fatma.Mokhtar@Sue.edu.eg

Nabil M. Selim; [nabil.selim@pharma.cu.edu.eg](mailto:nabil.selim@pharma.cu.edu.eg), orchid ID, 0000-0001-6252-000X

‡ These authors contributed equally to this work.

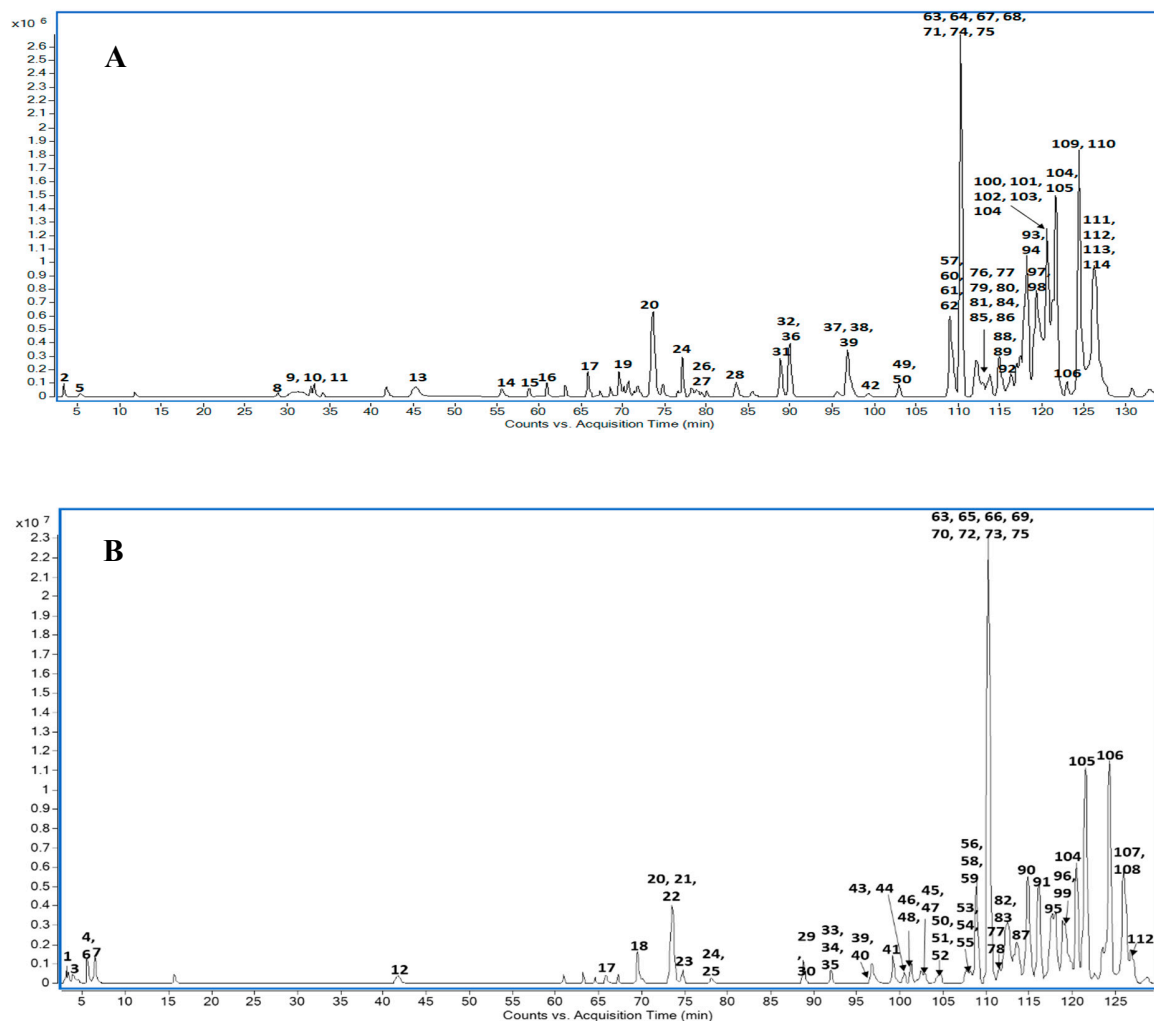

**Figure S1.** UPLC/MS chromatograms of identified constituents in the ethanolic extracts of *A. squamosa* (A) and *A. glabra* (B) fruits detected in positive ionization mode.

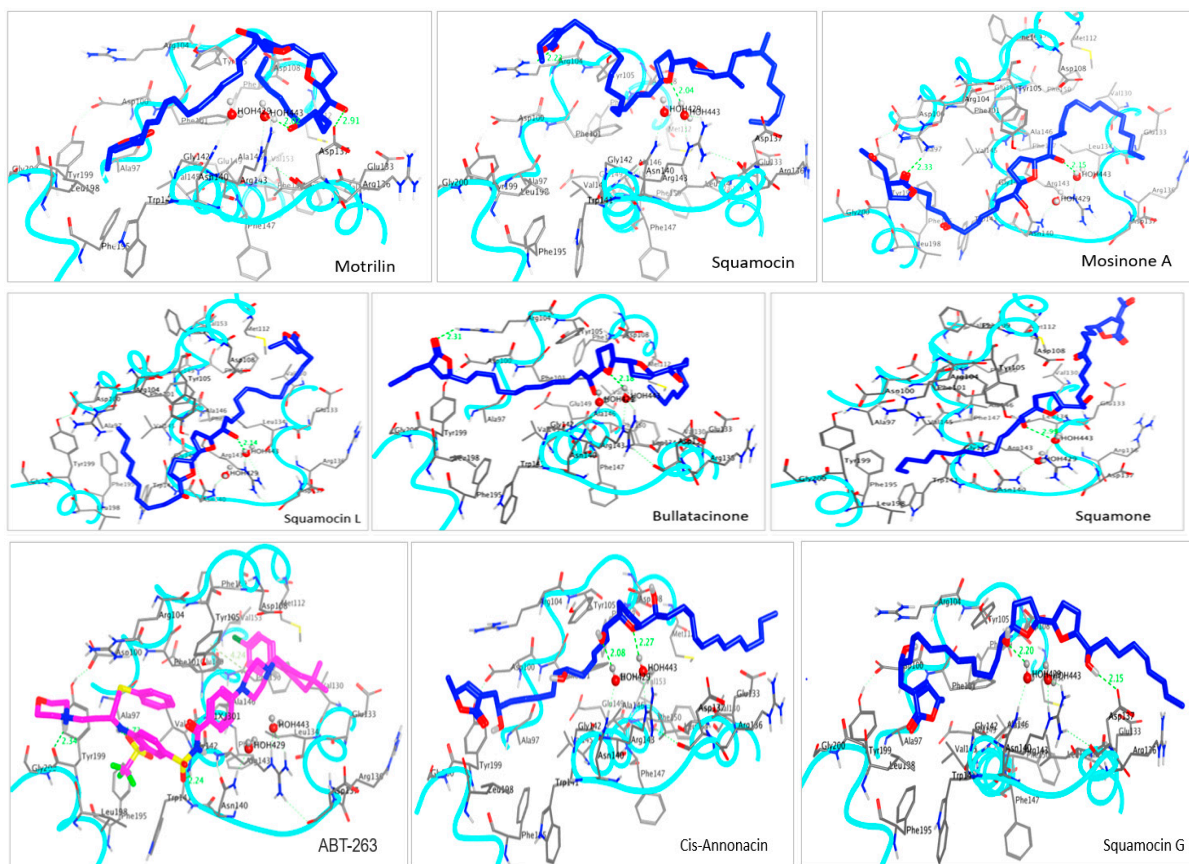

**Figure S2.** Visualization of interactions between the Bcl-2 receptor (4-LVT) and ABT-263, cis-annonacin, squamocin G, motrilin, squamocin, mosinone A, Squamocin L, bullatacinone, squamone, showed comparable or better binding energy and binding modes.

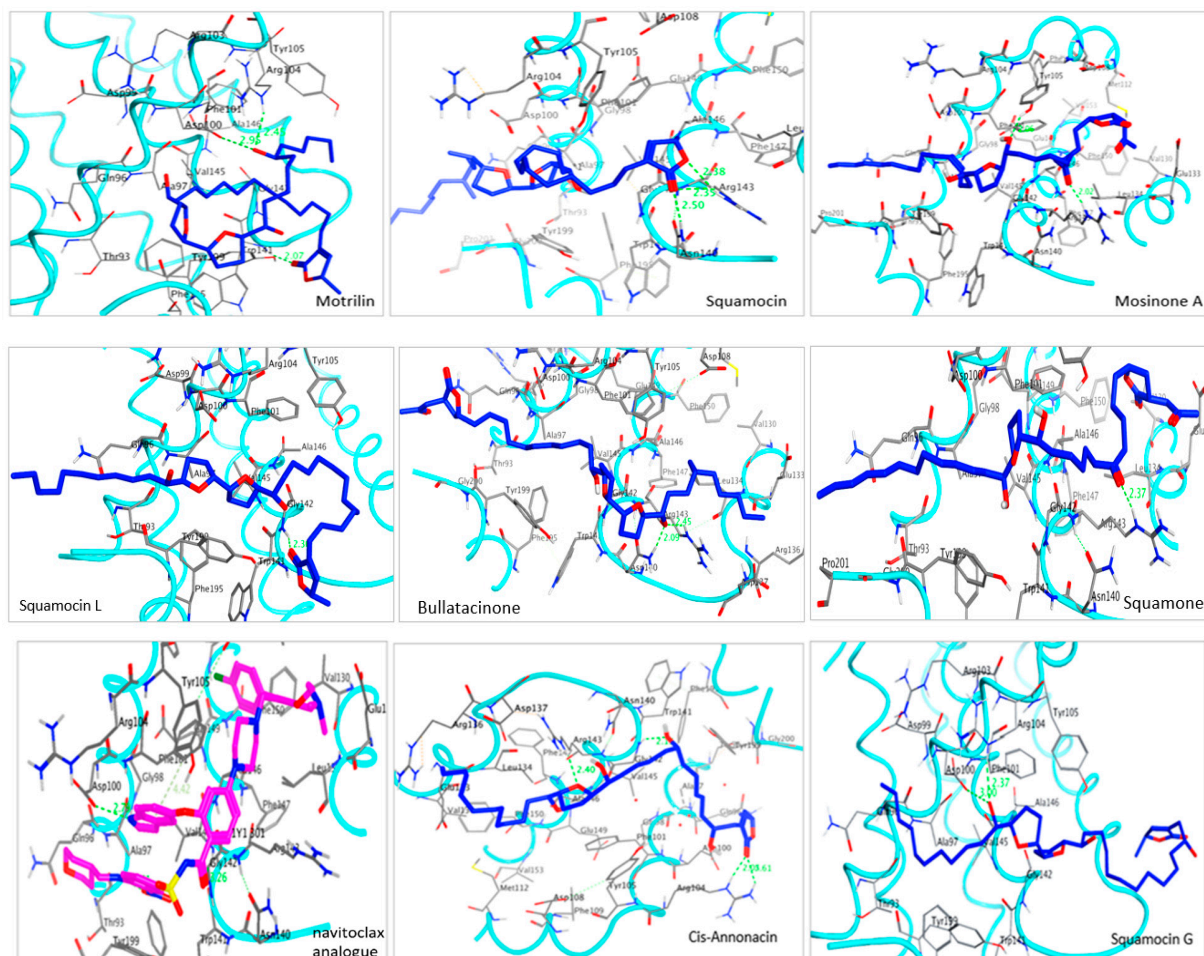

**Figure S3.** Visualization of interactions between the Bcl-2 receptor (4-MAN) and motrilin, squamocin, mosinone A, navitoclax analogue, cis-annonacin, squamocin G, squamocin L, bullatacinone, squamone, showed comparable or better binding energy and binding modes.

**Table S1.** Compounds identified in the extracts of *A. glabra* (AngTE) and *A. squamosa* (AnsTE) fruits, by UPLC-QTOF-MS/MS (positive mode).

| Peak no. | R <sub>T</sub> (min) | Indicated Molecular ion (m/z) |                     | Error ppm | Elemental composition                                        | Identification                     | MS/MS (m/z)                                      | Source |
|----------|----------------------|-------------------------------|---------------------|-----------|--------------------------------------------------------------|------------------------------------|--------------------------------------------------|--------|
|          |                      | (M+H) <sup>+</sup>            | (M+Na) <sup>+</sup> |           |                                                              |                                    |                                                  |        |
| 1        | 3.08                 |                               | 219.0266            | 1.41      | C <sub>9</sub> H <sub>9</sub> O <sub>5</sub> <sup>+</sup>    | Trihydroxycinnamic acid            | 203, 181, 147, 134, 112, 104                     | AngTE  |
| 2        | 3.19                 | 183.086                       | 205.0677            | 0.56      | C <sub>6</sub> H <sub>15</sub> O <sub>6</sub> <sup>+</sup>   | Sorbitol                           | 148, 118, 96, 74                                 | AnsTE  |
| 3        | 3.23                 |                               | 235.0206            | 4.62      | C <sub>9</sub> H <sub>9</sub> O <sub>6</sub> <sup>+</sup>    | Pentahydroxy cinnamaldehyde        | 222, 219, 203, 189, 184                          | AngTE  |
| 4        | 4.09                 |                               | 217.0681            | 1.23      | C <sub>7</sub> H <sub>15</sub> O <sub>6</sub> <sup>+</sup>   | Methyl inositol                    | 169, 157, 138, 129, 118                          | AngTE  |
| 5        | 5.21                 | 88.0758                       |                     | -0.53     | C <sub>4</sub> H <sub>10</sub> NO <sup>+</sup>               | 2-Hydroxypyrrolidine               | 74, 60                                           | AnsTE  |
| 6        | 5.61                 |                               | 215.0516            | 4.03      | C <sub>6</sub> H <sub>9</sub> O <sub>7</sub> <sup>+</sup>    | Citric acid                        | 186, 169, 152, 140, 130, 122, 96, 82             | AngTE  |
| 7        | 6.42                 |                               | 231.0839            | -0.11     | C <sub>8</sub> H <sub>17</sub> O <sub>6</sub> <sup>+</sup>   | Dimethyl inositol                  | 226, 209, 186, 169, 163, 145, 129, 112           | AngTE  |
| 8        | 32.69                | 195.101                       |                     | 0.43      | C <sub>11</sub> H <sub>15</sub> O <sub>3</sub> <sup>+</sup>  | Methoxyeugenol                     | 174, 169, 112, 96, 82                            | AnsTE  |
| 9        | 34.1                 | 328.153                       |                     | 1.75      | C <sub>19</sub> H <sub>22</sub> NO <sub>4</sub> <sup>+</sup> | Norcorydine                        | 276, 257, 234, 221, 197, 185, 174, 169, 157, 147 | AnsTE  |
| 10       | 34.1                 | 139.038                       |                     | 2.41      | C <sub>7</sub> H <sub>7</sub> O <sub>3</sub> <sup>+</sup>    | Salicylic acid                     | 112, 84                                          | AnsTE  |
| 11       | 34.1                 |                               | 141.05              | 6.89      | C <sub>4</sub> H <sub>7</sub> O <sub>4</sub> <sup>+</sup>    | Succinic acid                      | 112, 96                                          | AnsTE  |
| 12       | 41.57                | 323.169                       | 345.1511            | 2.47      | C <sub>14</sub> H <sub>27</sub> O <sub>8</sub> <sup>+</sup>  | Pachybiose                         | 276, 231, 197, 147, 120, 96                      | AngTE  |
| 13       | 45.31                | 107.070                       | 129.0519            | -0.22     | C <sub>4</sub> H <sub>11</sub> O <sub>3</sub> <sup>+</sup>   | Butanetriol                        | 96, 84                                           | AnsTE  |
| 14       | 55.72                |                               | 217.1045            | 1.47      | C <sub>8</sub> H <sub>19</sub> O <sub>5</sub> <sup>+</sup>   | Dimethyl rhamnitol                 | 174, 169, 112, 96, 82                            | AnsTE  |
| 15       | 58.85                | 255.267                       |                     | 3.12      | C <sub>17</sub> H <sub>35</sub> O <sup>+</sup>               | Dimethyl pentadecanone             | 234, 169, 151, 129, 96, 74, 64                   | AnsTE  |
| 16       | 60.87                | 235.116                       | 257.099             | 1.78      | C <sub>10</sub> H <sub>19</sub> O <sub>6</sub> <sup>+</sup>  | Dihydroxy dimethyloctanedioic acid | 197, 120, 96                                     | AnsTE  |

|    |       |         |          |       |                     |                                                                             |                                                       |              |
|----|-------|---------|----------|-------|---------------------|-----------------------------------------------------------------------------|-------------------------------------------------------|--------------|
| 17 | 65.92 | 391.248 |          | 2.60  | $C_{23}H_{35}O_5^+$ | <b>16-acetoxy-<i>ent</i>-kauran-19-al-17-methyl ester (Annoglabasin D)</b>  | 331, 300, 272, 233, 197, 169, 120                     | AnsTE, AngTE |
| 18 | 70.26 | 353.228 |          | -5.02 | $C_{20}H_{33}O_5^+$ | 7,16,17-trihydroxy- <i>ent</i> -kauran-19-oic acid                          | 309, 295, 265, 236, 213, 195, 185, 176, 156, 144, 129 | AngTE        |
| 19 | 70.68 | 319.226 |          | 1.66  | $C_{20}H_{31}O_3^+$ | 19-Oxo-17-kauranoic acid                                                    | 285, 253, 197, 167, 120                               | AnsTE        |
| 20 | 73.57 | 303.230 |          | 1.75  | $C_{20}H_{31}O_2^+$ | <i>Ent</i> -kaur-16-en-19-oic acid                                          | 242, 167, 151, 129                                    | AnsTE, AngTE |
| 21 | 73.71 | 379.242 |          | -14.9 | $C_{22}H_{35}O_5^+$ | 16-acetoxy-19-nor- <i>ent</i> -kauran-4-ol-17-methyl ester (Annoglabasin F) | 361, 302, 271, 243, 181, 149                          | AngTE        |
| 22 | 74.05 | 225.151 |          | 11.4  | $C_{13}H_{21}O_3^+$ | Blumenol A                                                                  | 159, 143                                              | AngTE        |
| 23 | 74.91 | 337.233 |          | -10.6 | $C_{20}H_{33}O_4^+$ | 16,17-Dihydroxy- <i>ent</i> -kauran-19-oic acid                             | 321, 296, 263, 205, 181, 158, 134                     | AngTE        |
| 24 | 77.24 | 303.231 |          | 0.7   | $C_{20}H_{31}O_2^+$ | 17-Hydroxy-15-kauren-19-al                                                  | 289, 248, 221, 193, 167, 144, 129                     | AnsTE, AngTE |
| 25 | 78.04 | 335.219 |          | 5.26  | $C_{20}H_{31}O_4^+$ | 16 Hydro- <i>ent</i> -kauran-17,19-dioic acid                               | 307, 279, 242, 213, 181, 149                          | AngTE        |
| 26 | 79.85 | 289.251 |          | 3.51  | $C_{20}H_{33}O^+$   | <i>Ent</i> -kaur-16-en-19-ol                                                | 271, 249, 208, 177, 161                               | AnsTE        |
| 27 | 81.48 |         | 373.2349 | -8.72 | $C_{21}H_{35}O_4^+$ | Annosquamosin D                                                             | 352, 333, 301, 278, 256, 239, 17, 197, 185, 157, 144  | AnsTE        |
| 28 | 85.83 |         | 317.2103 | -3.91 | $C_{18}H_{31}O_3^+$ | Squamostanal A                                                              | 305, 285, 255, 217, 197, 185, 167, 120                | AnsTE        |
| 29 | 88.75 | 319.223 |          | 9.63  | $C_{20}H_{31}O_3^+$ | 16-Hydro-19-al- <i>ent</i> -kauran-17-oic acid                              | 297, 253, 186, 144                                    | AngTE        |
| 30 | 88.95 | 639.481 | 661.4632 | 3.81  | $C_{37}H_{67}O_8^+$ | Squamostatin B                                                              | 621, 603, 585, 567, 395, 319, 297, 279, 186, 144      | AngTE        |
| 31 | 89.87 | 287.203 |          | -0.57 | $C_{20}H_{31}O^+$   | 16-Kauren-19-al                                                             | 269, 243, 233, 213, 197, 186, 167, 144, 125           | AnsTE        |

|    |        |         |          |       |                     |                                              |                                                                           |              |
|----|--------|---------|----------|-------|---------------------|----------------------------------------------|---------------------------------------------------------------------------|--------------|
| 32 | 91.28  | 305.247 |          | -0.13 | $C_{20}H_{33}O_2^+$ | 17-Hydroxy-16-kauran-19-al                   | 287, 235, 185, 157, 120, 105                                              | AnsTE        |
| 33 | 91.86  | 331.225 |          | -3    | $C_{21}H_{31}O_3^+$ | Methyl ent-7,15-dihydroxy-kaur-16-en-19-oate | 302, 277, 255, 217, 197, 186                                              | AngTE        |
| 34 | 91.88  | 639.481 | 661.4633 | 2.89  | $C_{37}H_{67}O_8^+$ | 27-Hydroxybullatacin                         | 393, 352, 339, 302, 277, 255, 186, 167, 144, 124                          | AngTE        |
| 35 | 92.05  | 639.481 |          | 1.9   | $C_{37}H_{67}O_8^+$ | Cherimolin-2                                 | 409, 352, 321, 281, 250, 217, 185, 144                                    | AngTE        |
| 36 | 92.6   | 639.482 |          | -0.84 | $C_{37}H_{67}O_8^+$ | Squamotin D                                  | 401, 352, 321, 281, 203, 167                                              | AnsTE        |
| 37 | 96.53  | 639.482 | 661.465  | 1.3   | $C_{37}H_{67}O_8^+$ | Squamostanin A                               | 601, 579, 507, 463, 401, 352, 323, 301, 279, 205, 167, 137                | AnsTE        |
| 38 | 96.84  | 639.482 | 661.464  | 5     | $C_{37}H_{67}O_8^+$ | Squamostanin B                               | 579, 507, 463, 352, 317, 301, 205, 185, 167, 137                          | AnsTE        |
| 39 | 96.94  | 639.482 | 661.4643 | 2.95  | $C_{37}H_{67}O_8^+$ | Squamostanin C                               | 601, 579, 507, 463, 401, 352, 323, 301, 205, 167, 137                     | AnsTE, AngTE |
| 40 | 97.03  | 611.451 |          | 2.59  | $C_{35}H_{63}O_8^+$ | Annoglaxin                                   | 409, 352, 295, 186, 167, 144, 125                                         | AngTE        |
| 41 | 99.16  | 639.481 | 661.4635 | 2.83  | $C_{37}H_{67}O_8^+$ | Glabracin A                                  | 449, 431, 413, 379, 361, 311, 309, 293, 291, 275, 241, 223, 215, 171, 141 | AngTE        |
| 42 | 99.27  | 639.485 |          | -4.64 | $C_{37}H_{67}O_8^+$ | Annosquatin IV                               | 401, 352, 301, 217, 124                                                   | AnsTE        |
| 43 | 100.47 | 639.480 | 661.4626 | 4.12  | $C_{37}H_{67}O_8^+$ | Glabracin B                                  | 449, 431, 413, 379, 361, 311, 309, 293, 291, 275, 241, 223, 215, 171, 141 | AngTE        |
| 44 | 101.38 | 639.480 | 661.4627 | 3.88  | $C_{37}H_{67}O_8^+$ | Squamostatin C                               | 613, 401, 352, 339, 331, 301, 279, 250, 225, 186, 167, 144                | AngTE        |

|    |        |         |          |       |                     |                                                     |                                                                           |              |
|----|--------|---------|----------|-------|---------------------|-----------------------------------------------------|---------------------------------------------------------------------------|--------------|
| 45 | 102.6  |         | 661.465  | -0.56 | $C_{37}H_{67}O_8^+$ | Annosquatin I                                       | 617, 595, 401, 352, 301, 217, 124                                         | AngTE        |
| 46 | 102.89 | 595.454 | 617.4368 | 3.4   | $C_{35}H_{63}O_7^+$ | Isoannonacinone                                     | 401, 352, 317, 217, 167, 144                                              | AngTE        |
| 47 | 103.1  | 595.457 | 617.4404 | -1.69 | $C_{35}H_{63}O_7^+$ | Molvizarin                                          | 512, 443, 401, 352, 309, 285, 250, 167, 96, 64                            | AngTE        |
| 48 | 103.67 | 321.239 |          | -8.3  | $C_{20}H_{33}O_3^+$ | 16-Hydroxy-ent-kauran-19-oic acid (Annoglabin E)    | 289, 271, 243, 229, 181, 151, 126                                         | AngTE        |
| 49 | 103.77 |         | 331.2249 | 1.8   | $C_{19}H_{33}O_3^+$ | Annosquamosin B                                     | 285, 258, 232, 182, 137                                                   | AnsTE        |
| 50 | 104.61 | 639.481 | 661.4627 | 3.34  | $C_{37}H_{67}O_8^+$ | Squamostanin D                                      | 613, 401, 352, 319, 279, 217, 167, 144, 124                               | AnsTE, AngTE |
| 51 | 104.64 | 597.470 |          | 4.35  | $C_{35}H_{65}O_7^+$ | Annonacin                                           | 485, 352, 331, 225, 167, 144                                              | AngTE        |
| 52 | 104.93 | 591.494 | 613.4787 | 2.68  | $C_{37}H_{67}O_5^+$ | Glabreicin A                                        | 597, 526, 482, 438, 401, 352, 326, 307, 285, 217, 197, 167, 144           | AngTE        |
| 53 | 107.74 | 347.254 |          | 9.51  | $C_{22}H_{35}O_3^+$ | 16-hydro-19-acetoxy-ent-kauran-17-al (Annoglabin G) | 331, 317, 303, 301, 273, 217, 185                                         | AngTE        |
| 54 | 108.25 |         | 617.4382 | -1.11 | $C_{35}H_{63}O_7^+$ | parviflorin                                         | 377, 352, 307, 279, 197, 167, 144, 124                                    | AngTE        |
| 55 | 108.85 | 623.486 | 645.4687 | 2.31  | $C_{37}H_{67}O_7^+$ | Glabranin                                           | 597, 427, 401, 379, 352, 331, 307, 285, 257, 232, 167, 144, 124           | AngTE        |
| 56 | 109    | 623.490 | 645.4709 | -1.14 | $C_{37}H_{67}O_7^+$ | Squamotin A                                         | 605, 591, 493, 428, 401, 352, 320, 303, 285, 257, 232, 212, 167, 144, 124 | AngTE        |
| 57 | 109.26 | 597.471 |          | -2.12 | $C_{35}H_{65}O_7^+$ | cis-Annonacin                                       | 591, 501, 469, 428, 401, 352, 303, 285                                    | AnsTE        |
| 58 | 109.36 |         | 619.452  | 2.5   | $C_{35}H_{65}O_7^+$ | Glacin A                                            | 352, 331, 313, 281, 263, 225, 167, 144                                    | AngTE        |
| 59 | 109.56 | 623.486 | 645.4684 | 2.63  | $C_{37}H_{67}O_7^+$ | 4-Deoxy-6-hydroxysquamotacin                        | 597, 427, 401, 379, 352, 331, 303, 285, 257, 232, 167, 144, 124           | AngTE        |
| 60 | 109.85 | 597.473 |          | 0.55  | $C_{35}H_{65}O_7^+$ | Squamoxinone C                                      | 591, 441, 427, 401, 352, 320, 303, 285, 257, 232, 212                     | AnsTE        |



|    |        |         |          |       |                     |                                                                                  |                                                                                    |                 |
|----|--------|---------|----------|-------|---------------------|----------------------------------------------------------------------------------|------------------------------------------------------------------------------------|-----------------|
| 61 | 109.86 | 597.473 |          | 0.55  | $C_{35}H_{65}O_7^+$ | Squadiolin C                                                                     | 579, 561, 543, 525<br>427, 401, 352, 303,<br>257, 212                              | AnsTE           |
| 62 | 109.86 |         | 645.4711 | -1.52 | $C_{37}H_{67}O_7^+$ | Squamosten A                                                                     | 501, 504, 352, 284,<br>217, 144, 124                                               | AnsTE           |
| 63 | 110.07 |         | 645.4713 | -1.9  | $C_{37}H_{67}O_7^+$ | Squamocin C                                                                      | 613, 591, 501, 406,<br>384, 352, 338, 301,<br>124                                  | AnsTE,<br>AngTE |
| 64 | 110.16 | 597.472 |          | 0.33  | $C_{35}H_{65}O_7^+$ | Isoannonacin                                                                     | 587, 493, 428, 401,<br>363, 352, 303, 257,<br>232                                  | AnsTE           |
| 65 | 110.27 | 623.486 | 645.4683 | 2.74  | $C_{37}H_{67}O_7^+$ | Squamostatin E                                                                   | 331, 323, 303, 294,<br>257, 232, 167, 144,<br>124                                  | AngTE           |
| 66 | 110.48 |         | 645.4715 | -2.01 | $C_{37}H_{67}O_7^+$ | Annosquatin V                                                                    | 591, 401, 352, 303,<br>217, 167, 124, 96                                           | AngTE           |
| 67 | 110.96 | 597.476 |          | -3.01 | $C_{35}H_{65}O_7^+$ | Annonacin A                                                                      | 493, 428, 401, 352,<br>303, 257, 232, 185                                          | AnsTE           |
| 68 | 110.96 |         | 645.4709 | -1.14 | $C_{37}H_{67}O_7^+$ | Squamocin H                                                                      | 554, 401, 371, 352,<br>217, 144, 124                                               | AnsTE           |
| 69 | 111.43 | 305.246 |          | -4.1  | $C_{20}H_{33}O_2^+$ | 16-Hydro-17-<br>hydroxy-ent-kauran-<br>19-al                                     | 270, 204, 173, 136                                                                 | AngTE           |
| 70 | 111.48 | 363.249 |          | 9.65  | $C_{22}H_{35}O_4^+$ | 16 $\alpha$ -hydro-19-<br>acetoxy-ent-kauran-<br>17-oic acid<br>(Annoglabasin B) | 345, 323, 311, 305,<br>289, 271, 234                                               | AngTE           |
| 71 | 111.69 | 595.458 |          | -7.52 | $C_{35}H_{63}O_7^+$ | Squamone                                                                         | 512, 468, 401, 352,<br>325, 285, 250, 217,                                         | AnsTE           |
| 72 | 111.78 |         | 619.4498 | 3.04  | $C_{35}H_{65}O_7^+$ | Glacin B                                                                         | 401, 352, 331, 225,<br>167, 144                                                    | AngTE           |
| 73 | 111.88 | 595.454 | 617.437  | 1.22  | $C_{35}H_{63}O_7^+$ | 6-<br>Hydroxydesacetyluva<br>ricin                                               | 401, 352, 317, 217,<br>167, 144                                                    | AngTE           |
| 74 | 111.89 |         | 613.4816 | -2.73 | $C_{37}H_{67}O_5^+$ | Squamocenin                                                                      | 605, 587, 493, 428,<br>401, 363, 352, 325,<br>303, 285, 257, 232,<br>212, 176, 144 | AnsTE           |
| 75 | 111.89 |         | 645.4703 | 0.16  | $C_{37}H_{67}O_7^+$ | Bullatacinone                                                                    | 613, 591, 540, 496,<br>401, 384, 352, 331,<br>301, 285, 205, 124                   | AnsTE,<br>AngTE |

|    |        |         |          |       |                     |                      |                                                            |              |
|----|--------|---------|----------|-------|---------------------|----------------------|------------------------------------------------------------|--------------|
| 76 | 112.1  |         | 617.4397 | -3.95 | $C_{35}H_{63}O_7^+$ | Bullacin             | 591, 540, 496, 452, 401, 352, 331, 285, 205, 185, 144, 124 | AnsTE        |
| 77 | 112.19 | 623.486 | 645.4682 | 2.84  | $C_{37}H_{67}O_7^+$ | Squamocin D          | 401, 352, 331, 313, 281, 180, 144, 124                     | AnsTE, AngTE |
| 78 | 112.79 |         | 603.4591 | -3.13 | $C_{35}H_{65}O_6^+$ | Corossolin           | 427, 352, 331, 309, 271                                    | AngTE        |
| 79 | 112.8  |         | 617.4393 | -0.82 | $C_{35}H_{63}O_7^+$ | Annonacinone         | 557, 559, 541, 496, 457, 401, 352, 331, 285, 205           | AnsTE        |
| 80 | 112.8  | 595.458 |          | -0.03 | $C_{35}H_{63}O_7^+$ | Squamolinone         | 556, 443, 401, 352, 317, 217, 124                          | AnsTE        |
| 81 | 113.1  | 595.457 | 617.4393 | -1.28 | $C_{35}H_{63}O_7^+$ | Squamocin E          | 512, 443, 401, 352, 309, 250, 217, 167, 124                | AnsTE        |
| 82 | 113.6  | 623.486 | 645.4698 | 1.23  | $C_{37}H_{67}O_7^+$ | Annonin I            | 379, 352, 323, 285, 198, 144, 124                          | AngTE        |
| 83 | 113.6  |         | 613.4841 | -3.71 | $C_{37}H_{67}O_5^+$ | Glabrencin B         | 379, 352, 323, 285, 217, 198, 144, 124                     | AngTE        |
| 84 | 113.71 | 639.482 | 661.4672 | -3.71 | $C_{37}H_{67}O_8^+$ | 9-Hydroxyasimicinone | 628, 613, 591, 429, 352, 301, 185, 167, 144, 124           | AnsTE        |
| 85 | 113.8  | 595.458 | 617.4393 | -0.03 | $C_{35}H_{63}O_7^+$ | Mosin B              | 556, 443, 401, 352, 317, 285, 250, 217, 124                | AnsTE        |
| 86 | 114.71 | 639.484 | 661.4632 | 3.41  | $C_{37}H_{67}O_8^+$ | Annonin XIV          | 628, 613, 591, 429, 352, 301, 185, 167, 144, 124           | AnsTE        |
| 87 | 114.81 | 623.486 | 645.4683 | 2.57  | $C_{37}H_{67}O_7^+$ | Bullatacin           | 587, 569, 401, 371, 352, 347, 325, 307, 144, 124           | AG TE        |
| 88 | 115.1  |         | 617.4404 | -1.69 | $C_{35}H_{63}O_7^+$ | Squamocin B          | 540, 401, 352, 285, 205, 124                               | AnsTE        |
| 89 | 115.13 |         | 315.2298 | 1.3   | $C_{19}H_{33}O_2^+$ | Annosquamosin C      | 308, 299, 295, 283, 281, 256, 232, 203, 193, 180, 134      | AnsTE        |
| 90 | 115.14 | 623.486 | 645.469  | 1.62  | $C_{37}H_{67}O_7^+$ | Asimicin             | 583, 401, 352, 325, 285, 144, 124                          | AG TE        |

|     |        |         |          |       |                     |                       |                                                                       |              |
|-----|--------|---------|----------|-------|---------------------|-----------------------|-----------------------------------------------------------------------|--------------|
| 91  | 115.15 |         | 645.4681 | 2.27  | $C_{37}H_{67}O_7^+$ | Motrilin              | 562, 384, 352, 285, 144, 124                                          | AG TE        |
| 92  | 116.1  | 595.458 | 617.4393 | -1.28 | $C_{35}H_{63}O_7^+$ | Mosin C               | 512, 443, 401, 352, 309, 250, 167, 96                                 | AnsTE        |
| 93  | 117.77 |         | 601.4455 | 0.63  | $C_{37}H_{61}O_6^+$ | Squamocin K           | 501, 391, 285, 144                                                    | AnsTE        |
| 94  | 118.26 |         | 645.47   | 0.08  | $C_{37}H_{67}O_7^+$ | Squamocin             | 591, 352, 331, 303, 217, 124                                          | AnsTE        |
| 95  | 118.45 |         | 615.4934 | 5.94  | $C_{37}H_{69}O_5$   | Uvariamicin I         | 501, 401, 352, 285, 217, 144, 124                                     | AG TE        |
| 96  | 119.06 | 623.488 | 645.4681 | 2.88  | $C_{37}H_{66}O_7^+$ | Squamotacin           | 501, 352, 285, 217, 144, 124                                          | AG TE        |
| 97  | 119.47 |         | 613.4808 | -0.57 | $C_{37}H_{67}O_5^+$ | Cis-Bullatencin       | 493, 401, 363, 325, 303, 285, 257, 232, 176, 144                      | AnsTE        |
| 98  | 119.47 |         | 645.4705 | -0.98 | $C_{37}H_{67}O_7^+$ | Squamocin G           | 613, 591, 493, 428, 401, 363, 352, 320, 303, 285, 257, 2323, 212, 142 | AnsTE        |
| 99  | 119.86 |         | 615.4931 | 7.26  | $C_{37}H_{69}O_5^+$ | 19-Epiuvariamicin III | 601, 544, 401, 352, 327, 284                                          | AG TE        |
| 100 | 120.58 |         | 643.4592 | -7.97 | $C_{37}H_{65}O_7^+$ | Mosinone A            | 601, 579, 501, 401, 384, 352, 285, 217, 184                           | AnsTE        |
| 101 | 120.58 |         | 615.4967 | -0.92 | $C_{37}H_{69}O_5^+$ | Reticulatain 2        | 579, 501, 401, 352, 285, 217, 184, 144, 124, 90                       | AnsTE        |
| 102 | 120.58 |         | 601.5411 | -0.94 | $C_{37}H_{61}O_6^+$ | Squamocin I           | 501, 391, 285, 144                                                    | AnsTE        |
| 103 | 120.88 | 593.513 | 615.4965 | -0.78 | $C_{37}H_{69}O_5^+$ | Squafosacin G         | 565, 501, 401, 352, 285, 217, 144, 124, 64                            | AnsTE        |
| 104 | 120.88 |         | 615.4965 | -0.78 | $C_{37}H_{69}O_5^+$ | Reticulatain 1        | 601, 501, 401, 352, 285, 217, 144, 124, 103, 64                       | AnsTE, AG TE |
| 105 | 120.98 |         | 645.4678 | 2.99  | $C_{37}H_{67}O_7^+$ | Squamocin F           | 601, 501, 401, 352, 285, 144, 124                                     | AS, AG TE    |
| 106 | 122.49 |         | 629.4723 | 2.36  | $C_{37}H_{67}O_6^+$ | Squamocin M           | 501, 401, 352, 310, 285, 144, 124, 103                                | AnsTE, AG TE |

|     |        |         |          |       |                     |                      |                                                  |              |
|-----|--------|---------|----------|-------|---------------------|----------------------|--------------------------------------------------|--------------|
| 107 | 125.02 |         | 615.491  | 7.89  | $C_{37}H_{69}O_5^+$ | 15-Epiuvariamicin I  | 501, 436, 413, 391, 352, 338, 285, 144, 124, 103 | AG TE        |
| 108 | 125.32 |         | 615.4933 | 4.99  | $C_{37}H_{69}O_5^+$ | 17-Epiuvariamicin II | 593, 501, 391, 352, 338, 285, 144, 124           | AG TE        |
| 109 | 125.93 |         | 629.4754 | -0.44 | $C_{37}H_{67}O_6^+$ | Squamotin C          | 565, 501, 401, 338, 285, 217, 144                | AnsTE        |
| 110 | 125.93 | 607.494 | 629.4763 | -1.22 | $C_{37}H_{67}O_6^+$ | Neoannonin B         | 501, 419, 338, 217, 144, 124, 64                 | AnsTE        |
| 111 | 126.03 |         | 629.4755 | -0.2  | $C_{37}H_{67}O_6^+$ | Squamocin N          | 501, 338, 285, 144, 124, 64                      | AnsTE        |
| 112 | 126.03 |         | 629.4723 | 2.34  | $C_{37}H_{67}O_6^+$ | Squamocin L          | 338, 312, 144, 103                               | AnsTE, AG TE |
| 113 | 126.94 | 607.495 | 629.4752 | 0     | $C_{37}H_{67}O_6^+$ | Squamotin B          | 565, 501, 401, 338, 285, 217, 144                | AnsTE        |
| 114 | 127.14 |         | 629.4759 | -0.6  | $C_{37}H_{67}O_6^+$ | Squamocin J          | 501, 401, 338, 285, 144                          | AnsTE        |

**Table S2:** Results of the minimum inhibitory concentration ( MIC) of the extracts

|                               | AngTE | Ang-AgNPs mg/ml | AnsTE | Ans-AgNPs |
|-------------------------------|-------|-----------------|-------|-----------|
| <i>Staphylococcus aureus</i>  | 8.25  | 0.75            | 8.25  | 0.375     |
| <i>Candida albicans</i>       | 8.25  | 0.375           | 4.125 | 0.093     |
| <i>Pseudomonas aeruginosa</i> | 16.5  | 0.187           | 16.5  | 0.75      |
| <i>Escherichia coli</i>       | 16.5  | 1.5             | 16.5  | 0.375     |

**Table S3.** The IC<sub>50</sub> (μg) of the ethanolic extracts of *A. squamosa*, *A. glabra*, and their nanoparticles against different human solid tumor cells.

| Sample    | IC <sub>50</sub> (μg) |            |                 |
|-----------|-----------------------|------------|-----------------|
|           | PC3                   | SKOV 3     | HeLa            |
| AngTE     | 6.8 ± 0.8             | 9.1 ± 0.6  | 5.7 ± 0.3       |
| Ang-AgNPs | 2.4 ± 0.3             | 2.8 ± 0.23 | 1.6 ± 0.1       |
| AnsTE     | 3.5 ± 0.1             | 1.6 ± 0.1  | 0.001 ± 0.0001  |
| Ans-AgNPs | 1.7 ± 0.4             | 1.2 ± 0.1  | 0.001 ± 0.00014 |

**Table S4.** Molecular docking results of major identified compounds from Ang TE and Ans TE

| Compound                    | Binding Score | Interacting Group<br>(Nearest amino acid residues)             | Hydrogen bond              | Bond length               | PDB ID |
|-----------------------------|---------------|----------------------------------------------------------------|----------------------------|---------------------------|--------|
| <b>Navitoclax (ABT-263)</b> | -10.76        | PHE101, TYR105, ASP108, GLY142, ARG143, ASN140, ASP108, LEU134 | GLY142<br>TYR199           | 2.24<br>2.34              | 4LVT   |
| <b>Cis-Annonacin</b>        | -10.59        | PHE101, TYR105, ASP108, ASN140, GLY142, ARG143                 | ASN140<br>ARG143           | 2.08<br>2.27              | 4LVT   |
| <b>Squamocin G</b>          | -10.68        | PHE101, TYR105, ARG104, ASN140, GLY142, ARG143                 | ASP137<br>ASN140<br>ARG143 | 2.15<br>2.20              | 4LVT   |
| <b>Motrilin</b>             | -10.74        | PHE101, TYR105, ASP108, GLU133, GLY142, LEU198                 | ASP137<br>ASN140<br>ARG143 | 2.91<br>2.02              | 4LVT   |
| <b>Squamocin</b>            | -10.56        | PHE101, TYR105, ARG138, ASN140, GLY142, ARG143                 | ARG104<br>ASN140<br>ARG143 | 2.22<br>2.04              | 4LVT   |
| <b>Mosinone A</b>           | -10.87        | PHE101, TYR105, ASP108, VAL130, ASN140, GLY142                 | ARG104<br>ASN140<br>ARG143 | 2.33<br>2.15              | 4LVT   |
| <b>Squamocin L</b>          | -9.78         | PHE101, TYR105, ASP108, MET112, ARG126, GLY142,                | ASN140<br>ARG143           | 2.14                      | 4LVT   |
| <b>Bullatacinone</b>        | -9.91         | ASP100, PHE101, TYR105, ASP137, GLY142, TYR199                 | ARG104<br>ARG143           | 2.31<br>2.18              | 4LVT   |
| <b>Squamone</b>             | -8.49         | PHE101, TYR105, ASP108, GLY142, PHE195, LEU198                 | ASN140<br>ARG143           | 2.91                      | 4LVT   |
| <b>Navitoclax analogue</b>  | -9.80         | PHE101, TYR105, GLU133, GLY142, ARG143, TYR199                 | GLY142<br>ASP100           | 3.26<br>2.79              | 4MAN   |
| <b>Cis-Annonacin</b>        | -9.92         | ASP100, ASP137, ASN140, GLY142, ARG143, TYR199                 | ARG104<br>GLY142<br>ARG143 | 2.05-2.61<br>2.17<br>2.40 | 4MAN   |
| <b>Squamocin G</b>          | -9.73         | ASP100, ARG104, TYR105, ASN 140, GLY142, TYR199                | ASP100<br>ARG104<br>ASP137 | 3.00<br>2.37<br>.....     | 4MAN   |
| <b>Motrilin</b>             | -9.69         | GLN92, ASP100, TYR105, ASN140, GLY142, LEU198                  | ASP100<br>ARG104<br>TRP141 | 2.95<br>2.45<br>2.07      | 4MAN   |
| <b>Squamocin</b>            | -9.76         | GLN92, ASP100, TYR105, LEU134, GLY142, TYR199                  | ASN140<br>ARG143           | 2.50<br>2.35-2.38         | 4MAN   |
| <b>Mosinone A</b>           | -9.48         | GLN92, ASP100, ASP108, LEU134, ASN140, TYR199                  | TYR105<br>ARG143           | 2.06<br>2.02              | 4MAN   |
| <b>Squamocin L</b>          | -8.16         | ALA97, ASP100, TYR105, ASN140, PRO201                          | GLY142                     | 2.34                      | 4MAN   |
| <b>Bullatacinone</b>        | -8.96         | ALA97, ASP100, TYR105, ASN140, GLY142, ARG143                  | ASN140<br>ARG143           | 2.09<br>2.45              | 4MAN   |

|                 |       |                                                 |        |      |      |
|-----------------|-------|-------------------------------------------------|--------|------|------|
| <b>Squamone</b> | -7.76 | ALA97, ASP100, TYR105<br>ASP108, ASN140, GLY142 | ARG143 | 2.37 | 4MAN |
|-----------------|-------|-------------------------------------------------|--------|------|------|
